# Supplementary material
Source: Springer Nature journal article supplement (https://www.springermedizin.de/resource/supplementary/12885_2012_3377_MOESM3_ESM.pdf/9463354)
Supplement: MOESM3 [file 9463354]

### Additional file 3 – Supplementary table 3.

Overall model fit of the EEC signatures in tissues (miR-99a/ 100/ 199b) and plasma (miR-99a/ 199b).

| miRNA signature    | Wald test |    |         | Hosmer & Lemeshow test |    |       |
|--------------------|-----------|----|---------|------------------------|----|-------|
|                    | $\chi^2$  | df | p       | $\chi^2$               | df | p     |
| miR-99a/ 100/ 199b | 18.22     | 3  | 0.0004  | 11.11                  | 8  | 0.195 |
| miR-99a/ 199b      | 22.8      | 2  | <0.0001 | 5.245                  | 8  | 0.731 |
